# Supplementary material for: Control of Heterologous Simian Immunodeficiency Virus SIVsmE660 Infection by DNA and Protein Coimmunization Regimens Combined with Different Toll-Like-Receptor-4-Based Adjuvants in Macaques
Source: PubMed Central journal article supplement (PMC6052320; doi:10.1128/jvi.00281-18), 2018-07-17

## Supplementary Figure legends

**Figure S1. Phenotypic analysis of PBMC.** Plots show expression of the indicated markers on CD4<sup>+</sup> and CD8<sup>+</sup> T cells analyzed by flow cytometry at baseline (pre-vaccination), at 2 weeks after 2<sup>nd</sup> vaccination and at 10 weeks after the 3<sup>rd</sup> vaccination. Naïve controls (grey diamonds) and sham controls injected at month 6 (day of EP3) with TLR4+7 (black diamond) or TLR7+QS21 (open diamond) adjuvants are shown. Bars indicate median values.

**Figure S2. Induction of V2 antibody responses.** (A) Alignment of the amino acid (AA) sequence of the V1V2 region of SIV<sub>mac239</sub> and SIV<sub>smE660-GC7V</sub>, the V2 cyclic peptides (SIV<sub>smE543</sub>) and SIV<sub>mac251</sub> linear peptides 26-28 is shown. The numbering follows the SIV<sub>mac239</sub> sequence. (B) Binding to each Env regions (detailed in Fig. S3) was measured as area-under-the-curve (AUC) and was calculated as percentage of the total AUC of Env gp120 (linear peptides 1-84). Adjusted p value are from 2-way ANOVA Holm-Sidak's multiple comparisons test. (C-E) bAb were measured to (C) cyclic SIV<sub>mac251</sub> V2 by SPR assay and BIAcore; (D, E) SIV-BAMA to SIV<sub>mac251</sub> gp70-V1V2 in (D) plasma and in (E) rectal and vaginal secretions. All plasma samples analyzed are from 2 weeks after the 3<sup>rd</sup> vaccination. Bars indicate median values.

**Figure S3. Linear peptide response analysis of plasma bAb.** The plasma samples of the individual animals were tested for their ability to bind to linear peptides spanning SIV<sub>mac251</sub> gp120 (115 peptides, 20-mer overlapping by 14 AA) by standard ELISA. OD<sub>450</sub> is reported after subtracting the mean OD<sub>450</sub> of the values obtained from naive plasma samples.

**Figure S4. Durability of vaccine-induced immune responses.** Durability of SIV<sub>smE660</sub> obtained at 2 and 18 weeks after the 3<sup>rd</sup> vaccination are shown for (A) plasma bAb; (B) NAb to SIV<sub>smE660/2A5-VTRN</sub>; and (C) SIV-specific (Gag and Env M766) IFN- $\gamma$ <sup>+</sup> T cell responses.

**Figure S5. SIV<sub>smE660</sub> acquisition in TRIM-5 $\alpha$  R macaques.** Kaplan–Meier curves of the number of SIV<sub>smE660</sub> exposures to infection of vaccinees and controls carrying the TRIM-5 $\alpha$  R<sup>+</sup> genotype with the TLR4+7 group (N=5, top panel) and the TLR4+QS21 group (N=5, lower panel) and the control animals (N=5). P value is from Gehan-Breslow-Wilcoxon test.

**Figure S6. Genetic analysis of T/F Env sequences.** Fifty-four informative sites were plotted as proportion of each AA compared to the consensus sequence. Residues 45 (T) and 47 (R), associated with neutralization resistance (54), showed the most prominent changes in the vaccinees compared to controls.

**Figure S7. Virus load measurements of the SIV<sub>smE660</sub>-infected animals.** Virus load measurements (SIV RNA copies per ml in log) of the plasma are shown over the 25 weeks of follow-up. The animals of vaccine groups and controls are shown (N=12). Geometric mean of virus loads for animals with TRIM-5 $\alpha$  R (N=5) and TRIM-5 $\alpha$  M/S (N=7) genotype are shown for TLR4+7, TLR4+QS21 and controls as dotted (TRIM R) and solid (TRIM M/S) lines. t, marks macaque T073 (control group) that developed AIDS-like symptoms and died at week 18 post-infection before study end.

**Figure S8. Anamnestic SIV-specific T cell responses and association of cytotoxic SIV-specific effector memory T cells with control of viremia.** (A) Gag and (B) Env CD4<sup>+</sup> (open bar) and CD8<sup>+</sup> (black bar) T cell responses were measured at 2 weeks before challenge and 8 weeks post-infection. (C) Comparison of total SIV-specific (Gag and Env SIV<sub>smE660</sub>-GC7V) IFN- $\gamma$ <sup>+</sup> GrzB<sup>+</sup> effector memory T cells measured 2 weeks before challenge and at peak after infection (week 4 or week 8). P values are from Wilcoxon matched-pairs signed rank test. (D) Inverse correlations of total SIV-specific (Gag and SIV<sub>smE660</sub>-GC7V) IFN- $\gamma$ <sup>+</sup> GrzB<sup>+</sup> effector memory T cell measured 2 weeks after 3<sup>rd</sup> vaccination and VL at peak (left panel) and during early post-peak phase (weeks

2-4 post-infection). Spearman  $r$  and  $P$  values are shown.

**TABLE S1.** Macaque information

| Group with adjuvant | Animal | Sex    | Date of birth | TRIM-5 $\alpha$ genotype | TRIM-5 $\alpha$ <sup>a</sup> |
|---------------------|--------|--------|---------------|--------------------------|------------------------------|
| TLR4+7              | T065   | Male   | 5/5/12        | TFP/TFP                  | R                            |
| TLR4+7              | T066   | Male   | 4/16/12       | Q/Q                      | S                            |
| TLR4+7              | T069   | Male   | 6/5/12        | TFP/Q                    | M                            |
| TLR4+7              | T071   | Male   | 5/1/12        | TFP/Q                    | M                            |
| TLR4+7              | T074   | Male   | 7/1/12        | Q/Q                      | S                            |
| TLR4+7              | T075   | Male   | 3/30/12       | TFP/CYPA                 | R                            |
| TLR4+7              | T078   | Male   | 3/30/12       | Q/CYPA                   | M                            |
| TLR4+7              | T092   | Female | 4/9/12        | TFP/TFP                  | R                            |
| TLR4+7              | T093   | Female | 5/27/12       | TFP/CYPA                 | R                            |
| TLR4+7              | T094   | Female | 4/16/12       | TFP/Q                    | M                            |
| TLR4+7              | T098   | Female | 4/20/12       | TFP/TFP                  | R                            |
| TLR4+7              | T099   | Female | 1/1/12        | TFP/Q                    | M                            |
| TLR4+QS21           | T072   | Male   | 4/22/12       | TFP/Q                    | M                            |
| TLR4+QS21           | T076   | Male   | 6/15/12       | TFP/TFP                  | R                            |
| TLR4+QS21           | T077   | Male   | 4/19/12       | Q/Q                      | S                            |
| TLR4+QS21           | T079   | Male   | 1/1/12        | Q/Q                      | S                            |
| TLR4+QS21           | T081   | Male   | 4/27/12       | TFP/CYPA                 | R                            |
| TLR4+QS21           | T083   | Male   | 9/1/12        | TFP/Q                    | M                            |
| TLR4+QS21           | T084   | Male   | 3/16/12       | Q/CYPA                   | M                            |
| TLR4+QS21           | T085   | Female | 1/1/12        | TFP/Q                    | M                            |
| TLR4+QS21           | T086   | Female | 1/1/12        | TFP/Q                    | M                            |
| TLR4+QS21           | T088   | Female | 5/1/12        | TFP/TFP                  | R                            |
| TLR4+QS21           | T090   | Female | 7/17/12       | TFP/CYPA                 | R                            |
| TLR4+QS21           | T091   | Female | 7/1/12        | TFP/TFP                  | R                            |
| Control/ TLR4+7     | T080   | Male   | 1/1/12        | TFP/CYPA                 | R                            |
| Control/ TLR4+7     | T082   | Male   | 6/6/12        | Q/Q                      | S                            |
| Control/ TLR4+7     | T095   | Female | 4/10/12       | TFP/TFP                  | R                            |
| Control/ TLR4+QS21  | T073   | Male   | 2/28/12       | TFP/Q                    | M                            |
| Control/ TLR4+QS21  | T087   | Female | 1/1/12        | Q/CYPA                   | M                            |
| Control/ TLR4+QS21  | T096   | Female | 6/6/12        | TFP/Q                    | M                            |
| Control naive       | T067   | Male   | 4/6/12        | TFP/Q                    | M                            |
| Control naive       | T068   | Male   | 4/5/12        | TFP/TFP                  | R                            |
| Control naive       | T070   | Male   | 4/19/12       | TFP/TFP                  | R                            |
| Control naive       | T089   | Female | 1/1/12        | Q/CYPA                   | M                            |
| Control naive       | T097   | Female | 4/5/12        | Q/Q                      | S                            |
| Control naive       | T100   | Female | 5/10/12       | TFP/CYPA                 | R                            |

<sup>a</sup>R, TRIM-5 $\alpha$  most resistant; M, TRIM-5 $\alpha$  moderate resistant; S, TRIM-5 $\alpha$ , most susceptible. Animals with M and S genotypes are combined in this study and referred to as M/S.

**Table S2.** Parameters measured by serum serology

| <b>Feature</b>                       | <b>Feature Name</b> | <b>Feature Description</b>                                                 |
|--------------------------------------|---------------------|----------------------------------------------------------------------------|
| <b>NK activity</b>                   | MIP-1 $\beta$       | NK cell MIP-1 $\beta$ activation                                           |
|                                      | IFN- $\gamma$       | NK cell IFN- $\gamma$ activation                                           |
|                                      | CD107a              | NK cell CD107a activation                                                  |
| <b>Effector Function</b>             | ADCD                | antibody-dependent complement deposition                                   |
|                                      | ADCC                | antibody-dependent cell-mediated cytotoxicity                              |
|                                      | ADCP                | antibody-dependent cellular phagocytosis                                   |
|                                      | ADNP                | antibody-dependent neutrophil phagocytosis                                 |
| <b>Individual Glycan Structures:</b> |                     |                                                                            |
| M766-specific IgG                    | G0F                 | agalactosylated (G0), fucosylated (F)                                      |
|                                      | G1B                 | galactosylated (G1), bisecting (B)                                         |
|                                      | G1S1                | galactosylated (G1), sialylated (S1)                                       |
|                                      | G1S1F               | galactosylated (G1), sialylated (S1), fucosylated (F)                      |
|                                      | G2                  | di-galactosylated (G2)                                                     |
|                                      | G2F                 | di-galactosylated (G2), fucosylated (F)                                    |
|                                      | G2FB                | di-galactosylated (G2), fucosylated (F), bisecting (B)                     |
|                                      | G2S1                | di-galactosylated (G2), sialylated (S1), fucosylated (F)                   |
|                                      | G2S1FB              | di-galactosylated (G2), sialylated (S1), fucosylated (F), bisecting (B)    |
|                                      | G2S2                | di-galactosylated (G2), di-sialylated (S2)                                 |
|                                      | G2S2B               | di-galactosylated (G2), di-sialylated (S2), bisecting (B)                  |
|                                      | G2S2F               | di-galactosylated (G2), di-sialylated (S2), fucosylated (F)                |
|                                      | G2S2FB              | di-galactosylated (G2), di-sialylated (S2), fucosylated (F), bisecting (B) |

**TABLE S3.** Association of humoral responses with virus acquisition and control of viremia

| Challenge phase    | Antibody determination <sup>a</sup> | Animals                            | Spearman r                        | p (two-tailed)      | p       | Graph shown in Figure |    |    |
|--------------------|-------------------------------------|------------------------------------|-----------------------------------|---------------------|---------|-----------------------|----|----|
| <b>acquisition</b> | gp140smE660 <sup>b</sup>            | TLR4+7                             | 0.6735                            | 0.0205              | *       | 4D                    |    |    |
|                    | NAbmac251.6 <sup>b</sup>            | Vaccinees                          | 0.4233                            | 0.0393              | *       |                       |    |    |
|                    | NAbmac251.6 <sup>b</sup>            | TLR4+7                             | 0.6020                            | 0.0429              | *       |                       |    |    |
|                    | <b>peak</b>                         | NAbsmE660/BR-CG7G.IR <sup>b</sup>  | Vaccinees                         | 0.6931              | 0.0002  | ***                   | 4E |    |
|                    |                                     | NAbsmE660/BR-CG7G.IR1 <sup>b</sup> | TLR4+7                            | 0.7149              | 0.0127  | *                     |    |    |
|                    |                                     | NAbsmE660/BR-CG7G.IR1 <sup>b</sup> | TLR4+7                            | 0.5667              | 0.0586  |                       |    |    |
|                    |                                     | <b>AUC 2-4</b>                     | NAbsmE660/2A5-VTRN <sup>b</sup>   | Vaccinees           | 0.5728  | 0.0034                | ** | 4F |
|                    |                                     |                                    | NAbsmE660/2A5-VTRN <sup>b</sup>   | TLR4+7              | 0.8541  | 0.0010                | ** |    |
|                    |                                     |                                    | NAbsmE660/2A5-VTRN <sup>b</sup>   | TLR4+7              | 0.6547  | 0.0251                | *  |    |
| <b>AUC 6-25</b>    |                                     |                                    | gp130 mac251 <sup>c</sup>         | TRIM-5 $\alpha$ M/S | -0.7904 | 0.0038                | ** | 5C |
|                    |                                     |                                    | V1V2 gp70-mac251 <sup>b</sup>     | TRIM-5 $\alpha$ M/S | -0.5385 | 0.0500                | *  |    |
|                    |                                     |                                    | V1V2 gp70-mac251 <sup>c</sup>     | TRIM-5 $\alpha$ M/S | -0.7113 | 0.0124                | *  |    |
|                    | <b>AUC 2-4</b>                      |                                    | V1V2 gp70-mac239 <sup>c</sup>     | TRIM-5 $\alpha$ M/S | -0.6409 | 0.0290                | *  | 5D |
|                    |                                     |                                    | gp130 mac251 <sup>c</sup>         | TRIM-5 $\alpha$ M/S | -0.6744 | 0.0205                | *  |    |
|                    |                                     |                                    | cyclic V2 E543 (F) <sup>b</sup>   | TRIM-5 $\alpha$ M/S | -0.6123 | 0.0224                | *  |    |
|                    |                                     | <b>AUC 6-25</b>                    | cyclic V2 E543 (S) <sup>b</sup>   | TRIM-5 $\alpha$ M/S | -0.6703 | 0.0107                | *  | 5E |
|                    |                                     |                                    | cyclic V2 mac251 (F) <sup>b</sup> | TRIM-5 $\alpha$ M/S | -0.6659 | 0.0113                | *  |    |
|                    |                                     |                                    | cyclic V2 mac251 (S) <sup>b</sup> | TRIM-5 $\alpha$ M/S | -0.6967 | 0.0072                | ** |    |
| <b>AUC 6-25</b>    |                                     |                                    | V1V2 gp70-mac251 <sup>b</sup>     | TRIM-5 $\alpha$ M/S | -0.5429 | 0.0479                | *  | 5F |
|                    |                                     |                                    | V1V2 gp70-mac251 <sup>c</sup>     | TRIM-5 $\alpha$ M/S | -0.6479 | 0.0268                | *  |    |
|                    |                                     |                                    | gp130 mac251 <sup>c</sup>         | TRIM-5 $\alpha$ M/S | -0.7686 | 0.0055                | ** |    |
|                    | <b>AUC 6-25</b>                     |                                    | V1V2 gp70-mac239 <sup>c</sup>     | TRIM-5 $\alpha$ M/S | -0.6549 | 0.0248                | *  | 5F |
|                    |                                     |                                    | V1V2 gp70-mac251 <sup>c</sup>     | TRIM-5 $\alpha$ M/S | -0.7465 | 0.0074                | ** |    |
|                    |                                     |                                    | cyclic V2 E543(F) <sup>b</sup>    | TRIM-5 $\alpha$ M/S | -0.5736 | 0.0349                | *  |    |
|                    |                                     | cyclic V2 E543(S) <sup>b</sup>     | TRIM-5 $\alpha$ M/S               | -0.6527             | 0.0136  | *                     |    |    |
|                    |                                     | cyclic V2 mac251(F) <sup>b</sup>   | TRIM-5 $\alpha$ M/S               | -0.6215             | 0.0201  | *                     |    |    |
|                    |                                     | cyclic V2 mac251(S) <sup>b</sup>   | TRIM-5 $\alpha$ M/S               | -0.662              | 0.0121  | *                     |    |    |

<sup>a</sup>Antibody determination at 2 weeks after 3<sup>rd</sup> vaccination.

<sup>b</sup>Antibody determination in plasma.

<sup>c</sup>Antibody determination in rectal mucosal samples.

**TABLE S4.** Association of cellular immune responses and control of viremia

| <b>Challenge phases</b> | <b>Antigen</b> | <b>Cellular Immunity<sup>a, b</sup></b>                                | <b>Spearman r</b> | <b>P (two-tailed)</b> | <b>P</b> | <b>Graph shown in Figure</b> |
|-------------------------|----------------|------------------------------------------------------------------------|-------------------|-----------------------|----------|------------------------------|
| <b>Peak</b>             | Gag+Env        | CD3 <sup>+</sup>                                                       | -0.6088           | 0.0236                | *        |                              |
|                         | Gag            | CD3 <sup>+</sup>                                                       | -0.6923           | 0.0077                | **       | 6C                           |
|                         | Env            | CD3 <sup>+</sup>                                                       | -0.5692           | 0.0366                | *        | 6D                           |
| <b>AUC wk 2-4</b>       | Gag+Env        | CD3 <sup>+</sup>                                                       | -0.5824           | 0.0318                | *        |                              |
|                         | Gag            | CD3 <sup>+</sup>                                                       | -0.7363           | 0.0037                | **       |                              |
|                         | Gag            | CD3 <sup>+</sup> CD4 <sup>+</sup>                                      | -0.6271           | 0.0186                | *        |                              |
|                         | Env            | CD3 <sup>+</sup> CD95 <sup>+</sup> CD28 <sup>+</sup> GrzB <sup>+</sup> | -0.5585           | 0.0411                | *        |                              |
| <b>AUC wk 6-25</b>      | Gag            | CD3 <sup>+</sup>                                                       | -0.5516           | 0.0438                | *        | 6E                           |

<sup>a</sup>Vaccinees with the TRIM-5 $\alpha$  M/S genotype.

<sup>b</sup>Cellular responses measured 2 weeks before 1<sup>st</sup> virus exposure.

Figure S1

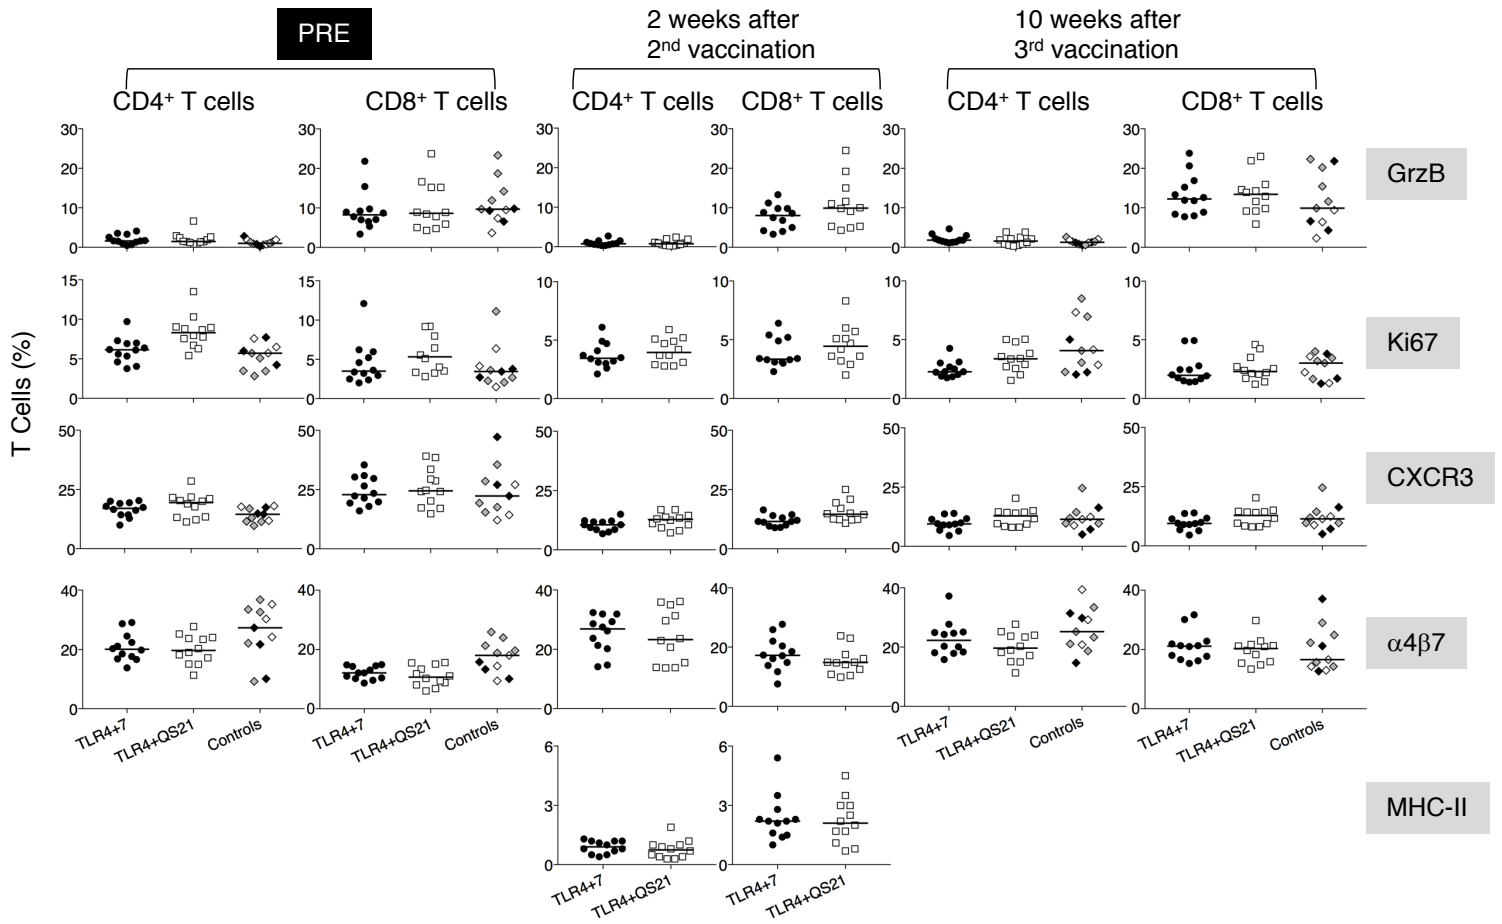



**A**

*V1 loop*

*V2 loop*

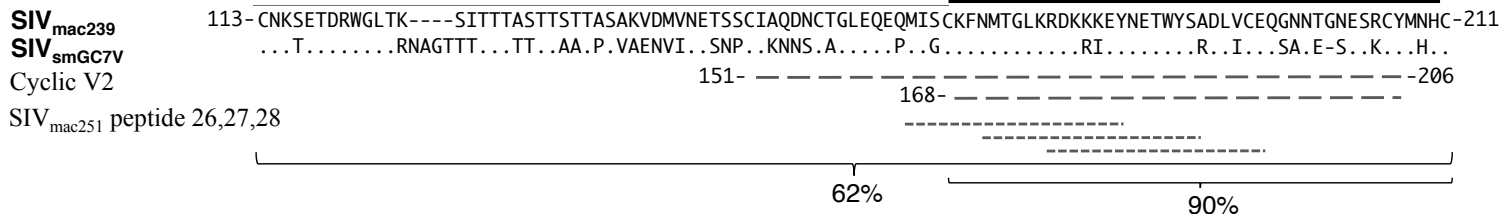

**B**

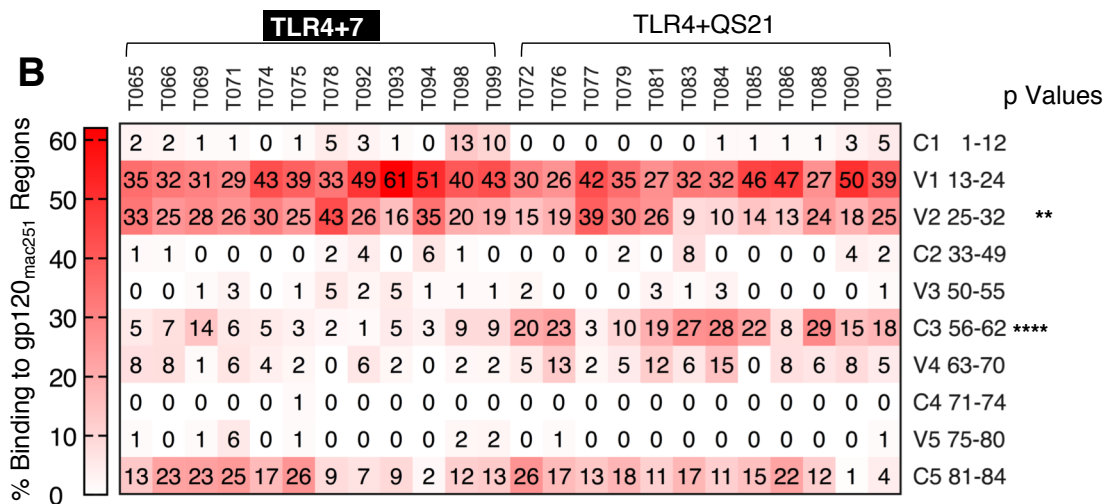

**C**

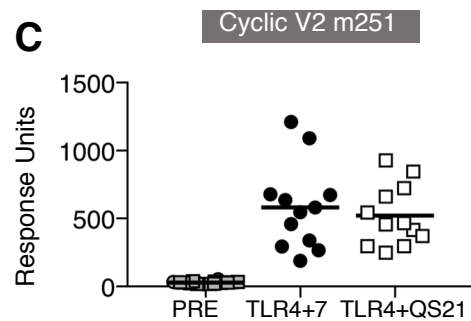

**D**

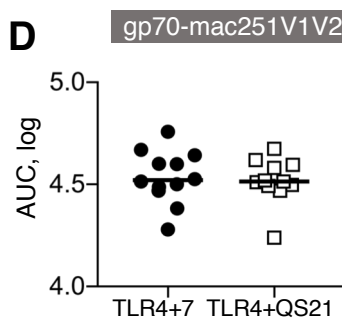

**E**

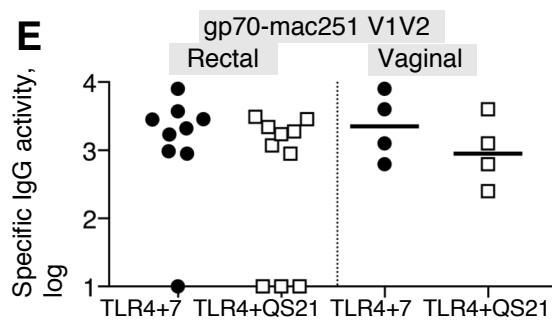

Figure S3

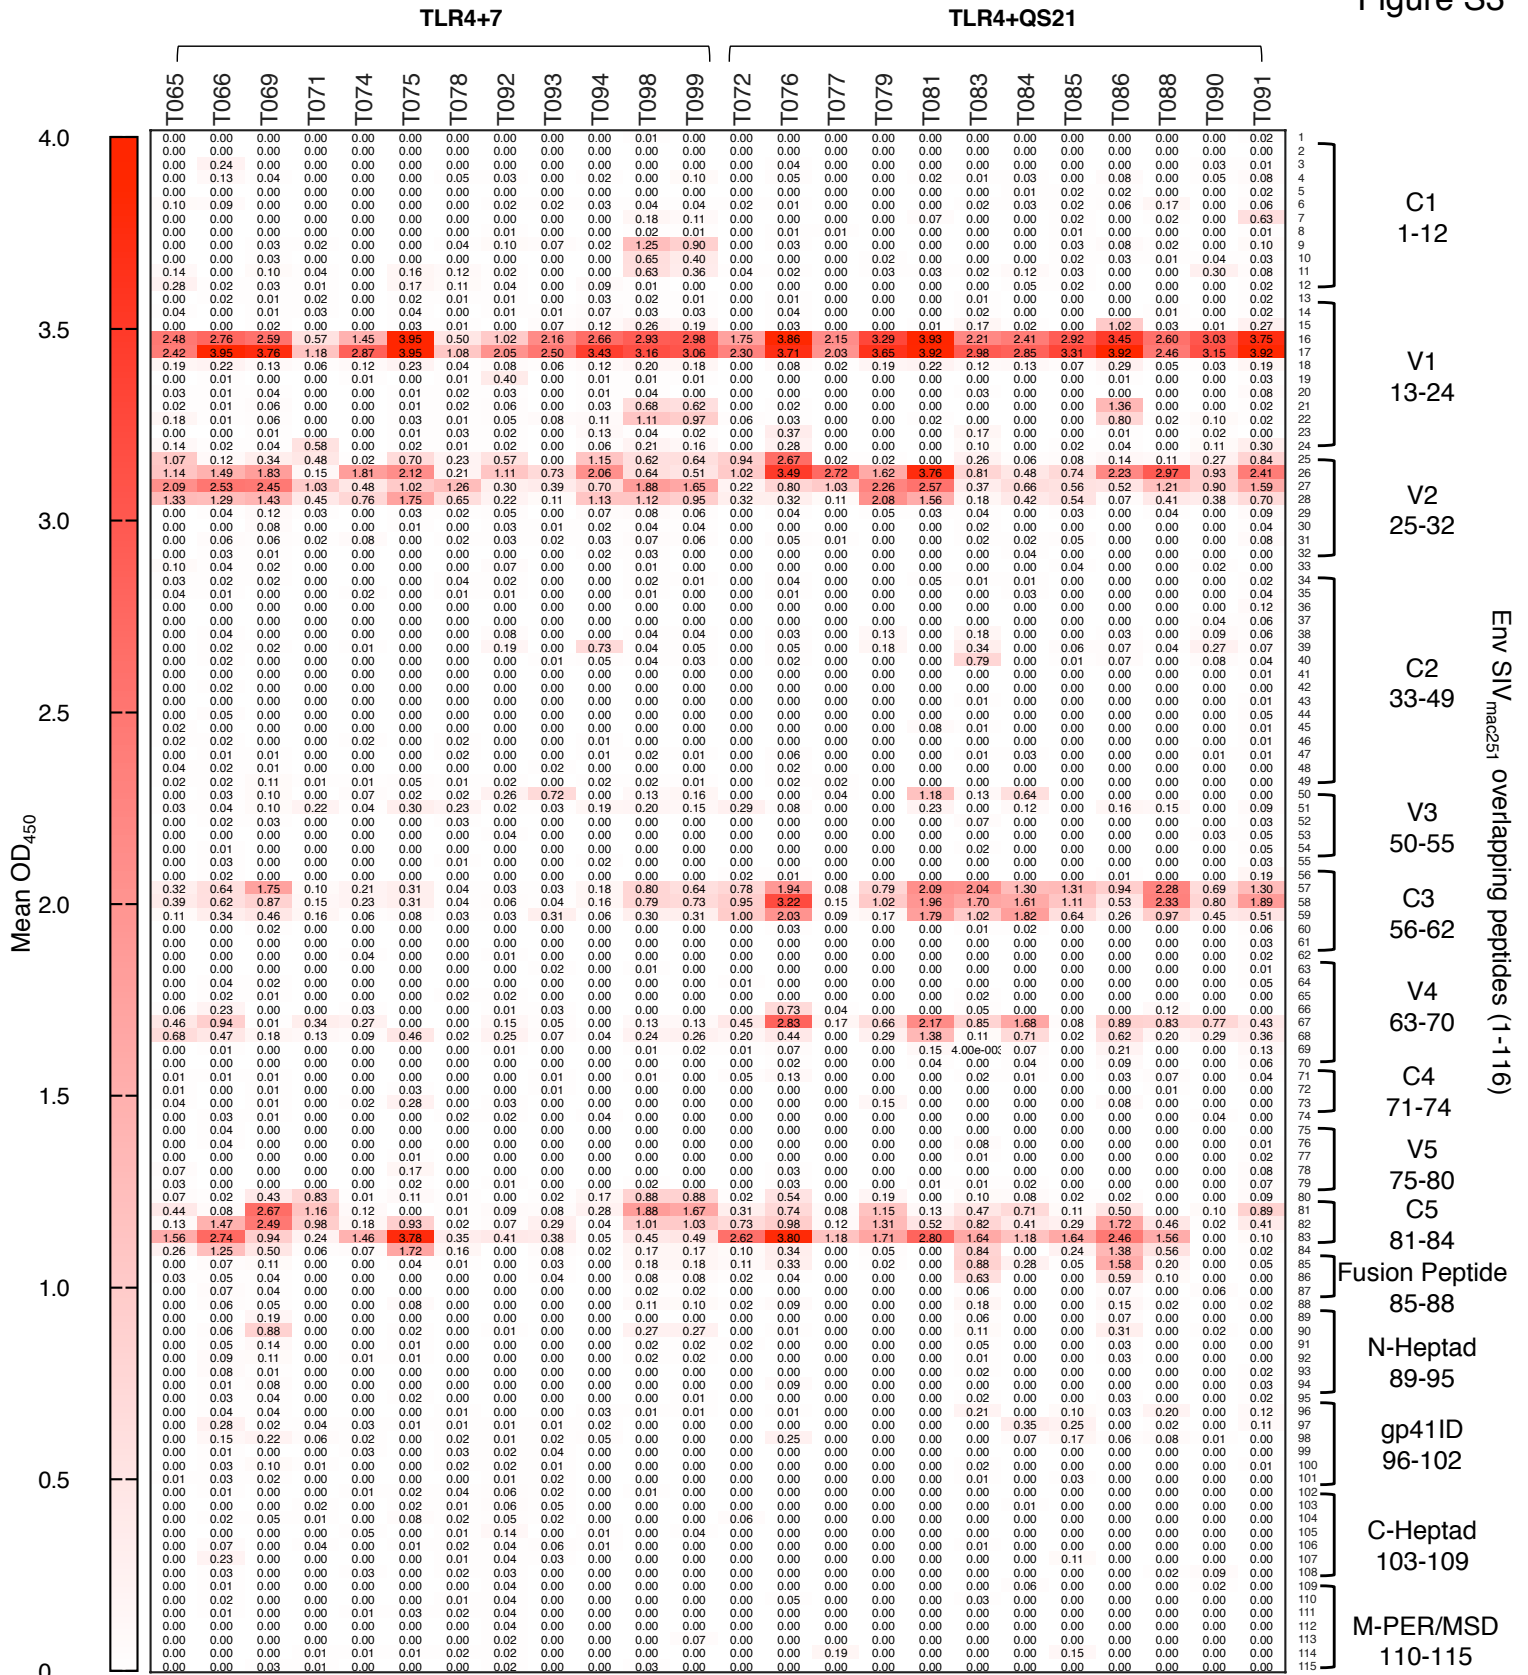

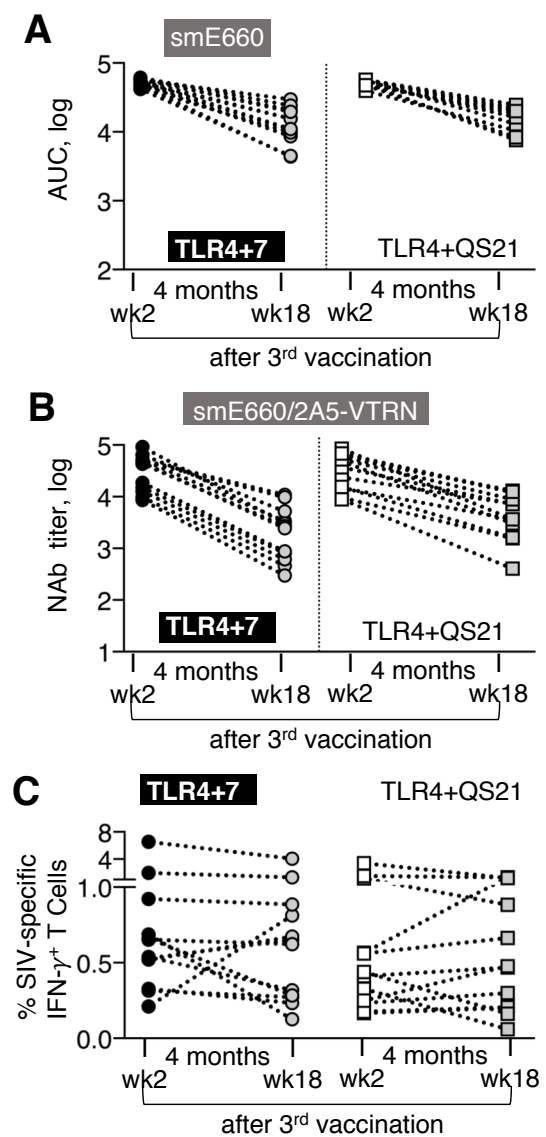

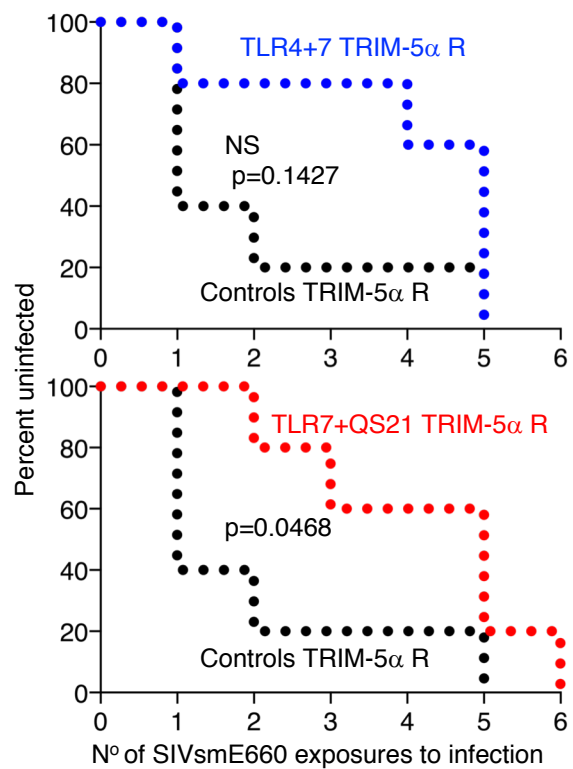

Figure S6

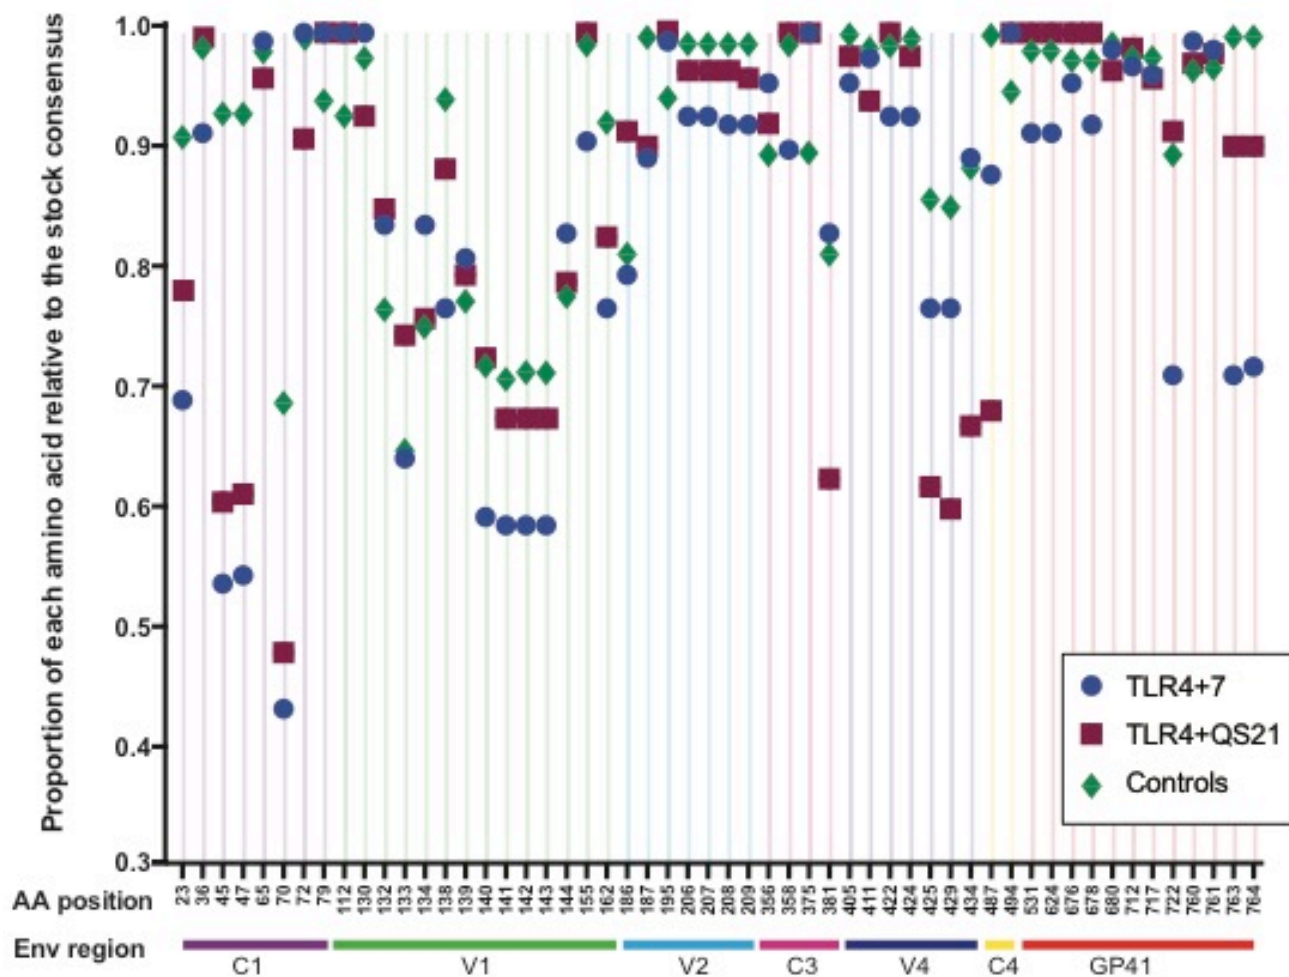

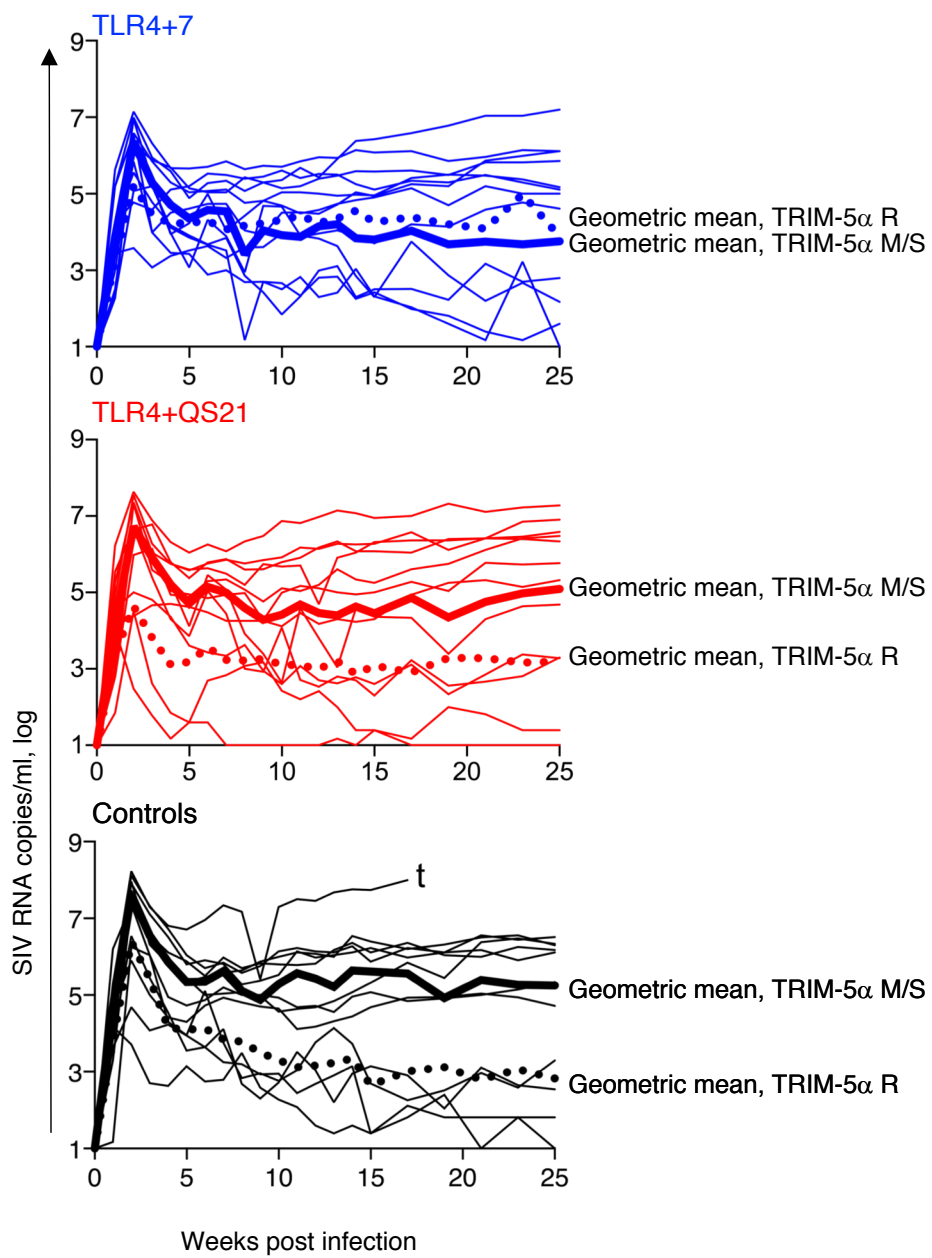

Figure S8

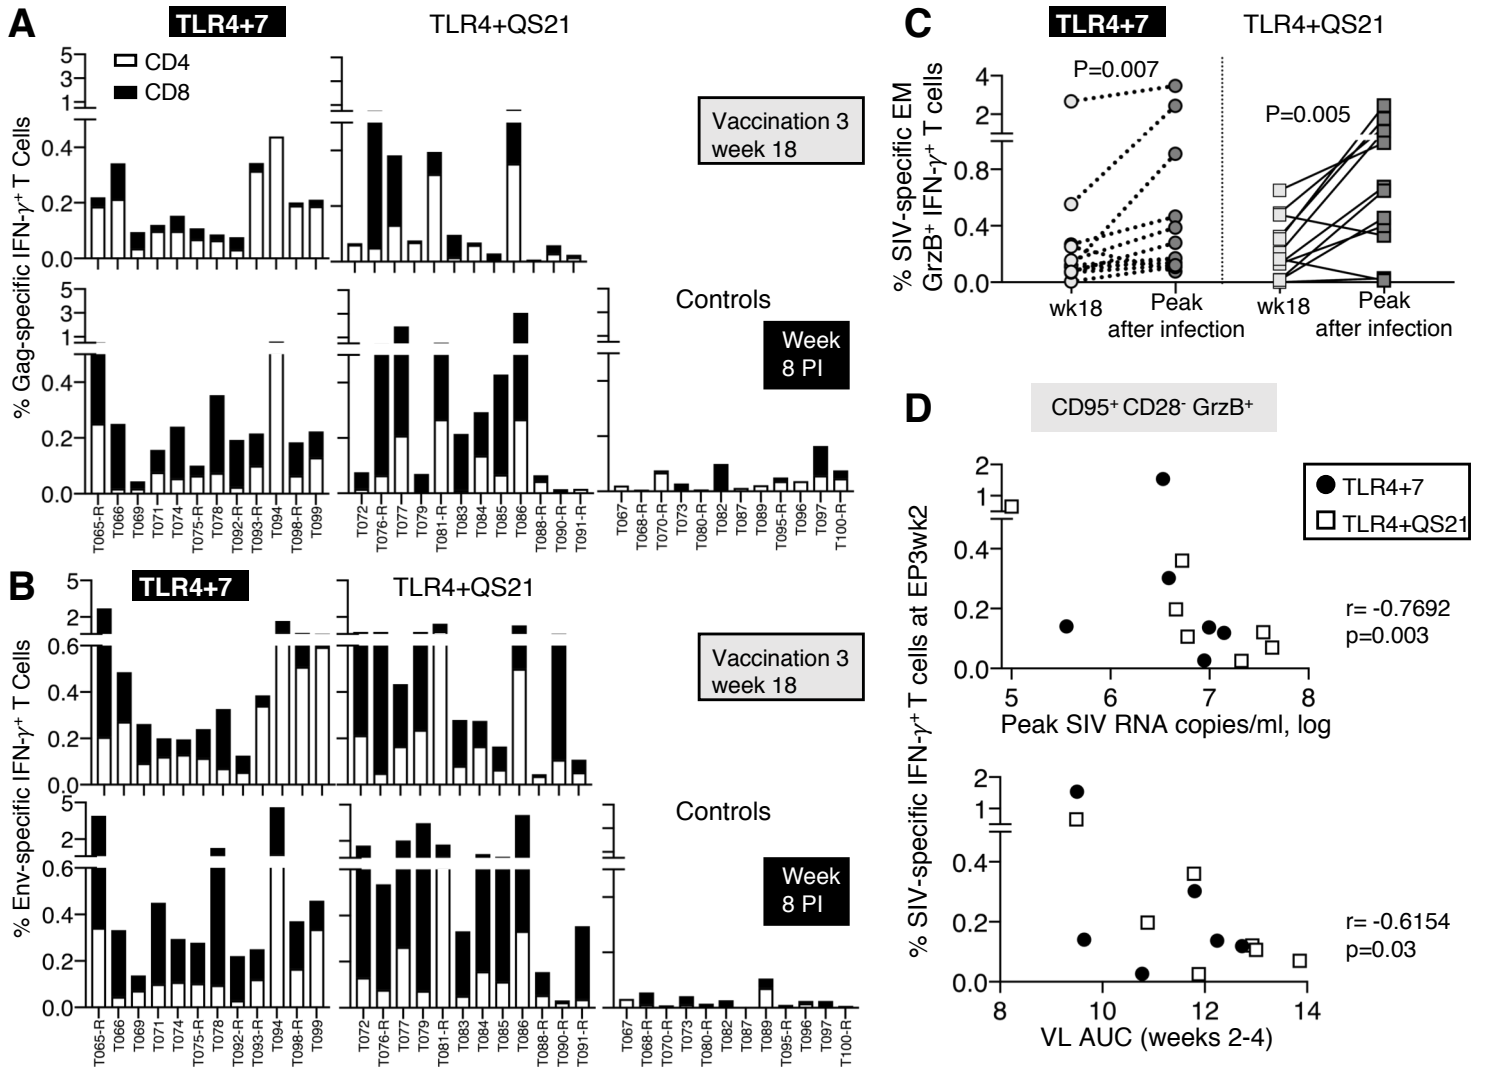

Supplement: JVI.00281-18_zjv015183736s1.pdf [file JVI.00281-18_zjv015183736s1.pdf]
